# Supplementary material
Source: MDPI journal article supplement (https://www.mdpi.com/2311-5637/10/4/194)
Supplement: s1 [file s1]

# Ethanol Production from a Mixture of Waste Tissue Paper and Food Waste through Saccharification and Mixed-Culture Fermentation

Hongzhi Ma <sup>1,2,3,\*</sup>, Yueyao Wang <sup>1</sup>, Pin Lv <sup>1</sup>, Jun Zhou <sup>3</sup>, Ming Gao <sup>1</sup>, Dayi Qian <sup>1,2</sup>, Bo Song <sup>1,2</sup> and Qunhui Wang <sup>1</sup>

<sup>1</sup> Department of Environmental Science and Engineering, University of Science and Technology Beijing, Beijing Key Laboratory of Resource-Oriented Treatment of Industrial Pollutants, Beijing 100083, China; wangyeyao@163.com (Y.W.); lp990910@163.com (P.L.); gaoming402@163.com (M.G.); qday@ustb.edu.cn (D.Q.); songbo@pku.edu.cn (B.S.); wangqh59@163.com (Q.W.)

<sup>2</sup> Xinjiang Key Laboratory of Clean Conversion and High Value Utilization of Biomass Resources, School of Resource and Environmental Science, Yili Normal University, Yining 835000, China

<sup>3</sup> Nanchang Institute of Science and Technology, Nanchang 330100, China; 15304690053@163.com

\* Correspondence: mahongzhi@ustb.edu.cn

## 1. Methods

### 1.1. Calculation Formula

The utilization rate of sugars and the yield of ethanol are calculated using the following formulas:

The sugar utilization rate is calculated as:

$$\text{Sugar Utilization Rate} = \frac{\rho(\text{consumed glucose}) + \rho(\text{consumed xylose})}{\rho(\text{initial glucose}) + \rho(\text{initial xylose})} \times 100\% \quad (\text{Equation 1})$$

The ethanol conversion rate is determined by:

$$\text{Ethanol Conversion Rate} = \frac{\rho(\text{ethanol in the fermentation liquid})}{\rho(\text{consumed glucose}) + \rho(\text{consumed xylose})} \times 100\% \quad (\text{Equation 2})$$

In these equations,  $\rho$  denotes the concentration of the respective compounds in the fermentation medium. Equation 1 represents the efficiency with which the fermentative organism utilizes the available sugars (glucose and xylose), while Equation 2 quantifies the efficiency of converting these consumed sugars into ethanol.

### 1.2. Statistical Analysis

The experimental data were analyzed using SPSS 27 for Least Significant Difference (LSD) analysis and Analysis of Variance (ANOVA).

## 2. Results

The ethanol yields from four different types of fermentation substrates were analyzed using SPSS 27, with the results displayed in Table S1. It was observed that both the urea-added group and the mixed substrate fermentation group showed significant inter-group differences compared to the other two groups. This indicates that adding urea and FW during the waste paper fermentation process can enhance ethanol yield. The significance level between the urea-added group and the mixed substrate fermentation group was 0.012, signifying that the difference is statistically significant, though not as pronounced as in other comparisons. This suggests that adding urea and FW during the waste paper fermentation process can achieve similar effects, suggesting that FW can serve as a high-quality nitrogen source for fermentation.

Letting A represent *Saccharomyces cerevisiae* and B represent *Candida shehatae*, a two-way ANOVA was conducted using SPSS 27 to examine the effect of pH on ethanol production. The results are presented in Table S2. From Table S2, it can be observed that pH variation significantly impacts the ethanol yield of both *Saccharomyces cerevisiae* and

**Citation:** Ma, H.; Wang, Y.; Lv, P.; Zhou, J.; Gao, M.; Qian, D.; Song, B.; Wang, Q. Ethanol Production from a Mixture of Waste Tissue Paper and Food Waste through Saccharification and Mixed-Culture Fermentation. *Fermentation* **2024**, *10*, 194. <https://doi.org/10.3390/fermentation10040194>

Academic Editor: Konstantinos G. Kalogiannis

Received: 2 February 2024

Revised: 18 March 2024

Accepted: 19 March 2024

Published: 2 April 2024

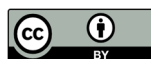

**Copyright:** © 2024 by the authors. Licensee MDPI, Basel, Switzerland. This article is an open access article distributed under the terms and conditions of the Creative Commons Attribution (CC BY) license (<https://creativecommons.org/licenses/by/4.0/>).

*Candida shehata*. Furthermore, by comparing the F-values and III sum of squares between groups A and B, it can be inferred that the effect of pH variation is more pronounced on *Candida shehata*. This finding corroborates the analysis results presented earlier regarding Figures 5.

The experimental results concerning temperature variations were analyzed using SPSS 27 through LSD analysis and ANOVA, with the findings presented in Table S3 and S4.

According to Table S3, the ANOVA reveals significant differences in yield among groups at different temperatures, indicating that temperature has a very significant impact on ethanol yield. From Table S4, it is evident that during the isothermal fermentation process, at a temperature of 33°C, the yield increased by 3.87% ( $p < 0.01$ ) and 0.98% ( $p = 0.011$ ) compared to the other two groups, indicating the highest ethanol yield at this temperature. Compared to all given isothermal conditions, the differences under non-isothermal fermentation conditions were significant, suggesting that non-isothermal fermentation can significantly enhance ethanol yield.

Table S1. Least Significant Difference Test for the results of the different substrates

| (I) Group     | (J) Group     | Mean value dif-<br>ference (I-J) | Standard Er-<br>ror | Sig.   | 95% Confidence Interval |             |
|---------------|---------------|----------------------------------|---------------------|--------|-------------------------|-------------|
|               |               |                                  |                     |        | Lower Limit             | Upper Limit |
| WTP           | WTP with urea | -17.50000%*                      | 0.44860%            | <0.001 | -18.5345%               | -16.4655%   |
|               | WTP with FW   | -18.95333%*                      | 0.44860%            | <0.001 | -19.9878%               | -17.9189%   |
|               | FW            | -11.53333%*                      | 0.44860%            | <0.001 | -12.5678%               | -10.4989%   |
| WTP with urea | WTP           | 17.50000%*                       | 0.44860%            | <0.001 | 16.4655%                | 18.5345%    |
|               | WTP with FW   | -1.45333%*                       | 0.44860%            | .012   | -2.4878%                | -0.4189%    |
|               | FW            | 5.96667%*                        | 0.44860%            | <0.001 | 4.9322%                 | 7.0011%     |
| WTP with FW   | WTP           | 18.95333%*                       | 0.44860%            | <0.001 | 17.9189%                | 19.9878%    |
|               | WTP with urea | 1.45333%*                        | 0.44860%            | .012   | 0.4189%                 | 2.4878%     |
|               | FW            | 7.42000%*                        | 0.44860%            | <0.001 | 6.3855%                 | 8.4545%     |
| FW            | WTP           | 11.53333%*                       | 0.44860%            | <0.001 | 10.4989%                | 12.5678%    |
|               | WTP with urea | -5.96667%*                       | 0.44860%            | <0.001 | -7.0011%                | -4.9322%    |
|               | WTP with FW   | -7.42000%*                       | 0.44860%            | <0.001 | -8.4545%                | -6.3855%    |

\*. The significance level of the difference in mean values is 0.05.

Table S2. Analysis of variance for the results of the pH

| Source          | Type III Sum of Squares | df        | Mean Square | F         | Sig.      | Source |
|-----------------|-------------------------|-----------|-------------|-----------|-----------|--------|
| Corrected       | A                       | 34.098a   | 3           | 11.366    | 66.296    | <0.001 |
| Model           | B                       | 109.168b  | 3           | 36.389    | 168.074   | <0.001 |
| Intercept       | A                       | 14819.944 | 1           | 14819.944 | 86443.068 | <0.001 |
|                 | B                       | 16030.830 | 1           | 16030.830 | 74042.554 | <0.001 |
| pH              | A                       | 34.098    | 3           | 11.366    | 66.296    | <0.001 |
|                 | B                       | 109.168   | 3           | 36.389    | 168.074   | <0.001 |
| Error           | A                       | 1.372     | 8           | .171      |           |        |
|                 | B                       | 1.732     | 8           | .217      |           |        |
| Total           | A                       | 14855.413 | 12          |           |           |        |
|                 | B                       | 16141.730 | 12          |           |           |        |
| Corrected Total | A                       | 35.469    | 11          |           |           |        |
|                 | B                       | 110.900   | 11          |           |           |        |

a R Squared = 0.961

b R Squared = 0.984

Table S3. Analysis of Variance for the results of the different Temperature

| Source         | Type III Sum of Squares | df | Mean Square | F       | Sig.   |
|----------------|-------------------------|----|-------------|---------|--------|
| Between Groups | 124.767                 | 3  | 41.589      | 309.404 | <0.001 |
| Within Groups  | 1.075                   | 8  | 0.134       |         |        |
| Total          | 125.843                 | 11 |             |         |        |

Table S4. Least Significant Difference Test for the results of the different Temperature

| (I) Group      | (J) Group      | Mean value difference (I-J) | Standard Error | Sig.   | 95% Confidence Interval |             |
|----------------|----------------|-----------------------------|----------------|--------|-------------------------|-------------|
|                |                |                             |                |        | Lower Limit             | Upper Limit |
| 30°C           | 33°C           | -3.87667%*                  | 0.29935%       | <0.001 | -4.5670%                | -3.1864%    |
|                | 35°C           | -2.89333%*                  | 0.29935%       | <0.001 | -3.5836%                | -2.2030%    |
|                | Non-Isothermal | -8.93667%*                  | 0.29935%       | <0.001 | -9.6270%                | -8.2464%    |
| 33°C           | 30°C           | 3.87667%*                   | 0.29935%       | <0.001 | 3.1864%                 | 4.5670%     |
|                | 35°C           | 0.98333%*                   | 0.29935%       | .011   | 0.2930%                 | 1.6736%     |
|                | Non-Isothermal | -5.06000%*                  | 0.29935%       | <0.001 | -5.7503%                | -4.3697%    |
| 35°C           | 30°C           | 2.89333%*                   | 0.29935%       | <0.001 | 2.2030%                 | 3.5836%     |
|                | 33°C           | -0.98333%*                  | 0.29935%       | .011   | -1.6736%                | -0.2930%    |
|                | Non-Isothermal | -6.04333%*                  | 0.29935%       | <0.001 | -6.7336%                | -5.3530%    |
| Non-Isothermal | 30°C           | 8.93667%*                   | 0.29935%       | <0.001 | 8.2464%                 | 9.6270%     |
|                | 33°C           | 5.06000%*                   | 0.29935%       | <0.001 | 4.3697%                 | 5.7503%     |
|                | 35°C           | 6.04333%*                   | 0.29935%       | <0.001 | 5.3530%                 | 6.7336%     |

\*. The significance level of the difference in mean values is 0.05.
